# Supplementary material for: Photochromic and electrochromic properties of oxo-centred triruthenium compounds with a dithienylethene bis(phosphine) ligand
Source: Royal Society of Chemistry journal article supplement (doi:10.1039/b913239b), 2009-01-01
Supplement: b913239b.pdf [file b913239b.pdf]

# Electronic Supplementary Information

## Syntheses, Photochromic and Electrochromic Properties of Oxo-centred Triruthenium Compounds With Dithienylethene Bis(phosphine) Ligand

Feng-Rong Dai, Bin Li, Lin-Xi Shi, Li-Yi Zhang and Zhong-Ning Chen\*

*State Key Laboratory of Structural Chemistry, Fujian Institute of Research on the Structure of Matter, the  
Chinese Academy of Sciences, Fuzhou, Fujian 350002, China*

E-mail: [czn@fjirsm.ac.cn](mailto:czn@fjirsm.ac.cn)

**Table S1.**  $^1\text{H}$  NMR Chemical Shifts ( $\delta$ ) for Compounds  $[\mathbf{2(o)}]^+$ ,  $[\mathbf{3(o)}]^{2+}$ ,  $\mathbf{2(o)}$ , and  $\mathbf{3(o)}$ .

|                | $[\mathbf{2(o)}]^+$        | $[\mathbf{3(o)}]^{2+}$      | $\mathbf{2(o)}$             | $\mathbf{3(o)}$             |
|----------------|----------------------------|-----------------------------|-----------------------------|-----------------------------|
| $\delta$ (OAc) | 0.898 (3H)                 | 0.928 (3H)                  | 1.296 (3H)                  | 1.725 (24H)                 |
|                | 1.295 (3H)                 | 0.945 (3H)                  | 1.873 (9H)                  | 1.847 (12H)                 |
|                | 1.683 (3H)                 | 0.986 (6H)                  | 2.037 (3H)                  |                             |
|                | 4.384 (3H)                 | 1.003 (6H)                  | 2.133 (3H)                  |                             |
|                | 6.324 (3H)                 | 1.296 (3H)                  |                             |                             |
|                | 9.658 (3H)                 | 4.063 (6H)                  |                             |                             |
|                |                            | 6.249 (3H)                  |                             |                             |
|                |                            | 9.594 (6H)                  |                             |                             |
| $\delta$ (DTE) | 2.278 (6H, $\text{CH}_3$ ) | 2.351 (6H, $-\text{CH}_3$ ) | 2.075 (6H, $-\text{CH}_3$ ) | 2.049 (6H, $-\text{CH}_3$ ) |
|                | 2.233 (2H, $\text{CH}_2$ ) | 2.370 (4H, $-\text{CH}_2$ ) | 0.886 (2H, $-\text{CH}_2$ ) | 1.298 (2H, $-\text{CH}_2$ ) |
|                | 2.847 (2H, $\text{CH}_2$ ) | 3.099 (2H, $-\text{CH}_2$ ) | 2.739 (4H, $-\text{CH}_2$ ) | 2.714 (4H, $-\text{CH}_2$ ) |
|                | 3.005 (2H, $\text{CH}_2$ ) | 4.887 (1H, CH)              | 7.011 (1H, CH)              | 7.499 (2H, CH)              |
|                | 6.324 (1H, CH)             | 6.249 (1H, CH)              | 7.323 (1H, CH)              |                             |
|                | 6.838 (1H, CH)             |                             |                             |                             |
| $\delta$ (Ph)  | 5.984 (4H)                 | 4.100-4.600 (6H)            | 7.341-7.528 (20H)           | 7.350-7.450 (12H)           |
|                | 7.308-7.598 (16H)          | 5.969 (4H)                  |                             | 7.734 (8H)                  |
|                |                            | 7.554-7.769 (10H)           |                             |                             |
| $\delta$ (py)  | 7.950 (2H, m)              | 2.032 (4H, m)               | 7.967 (4H, m)               | 7.968 (8H, m)               |
|                | 8.256 (2H, m)              | 3.859 (2H, p)               | 8.239 (2H, p)               | 8.224 (4H, p)               |
|                | 9.658 (6H, o, p)           | 4.100-4.600 (4H, o)         | 9.166 (4H, o)               | 9.343 (8H, o)               |
|                |                            | 7.956 (2H, m)               |                             |                             |
|                |                            | 8.239 (2H, m)               |                             |                             |
|                |                            | 9.594 (6H, o, p)            |                             |                             |

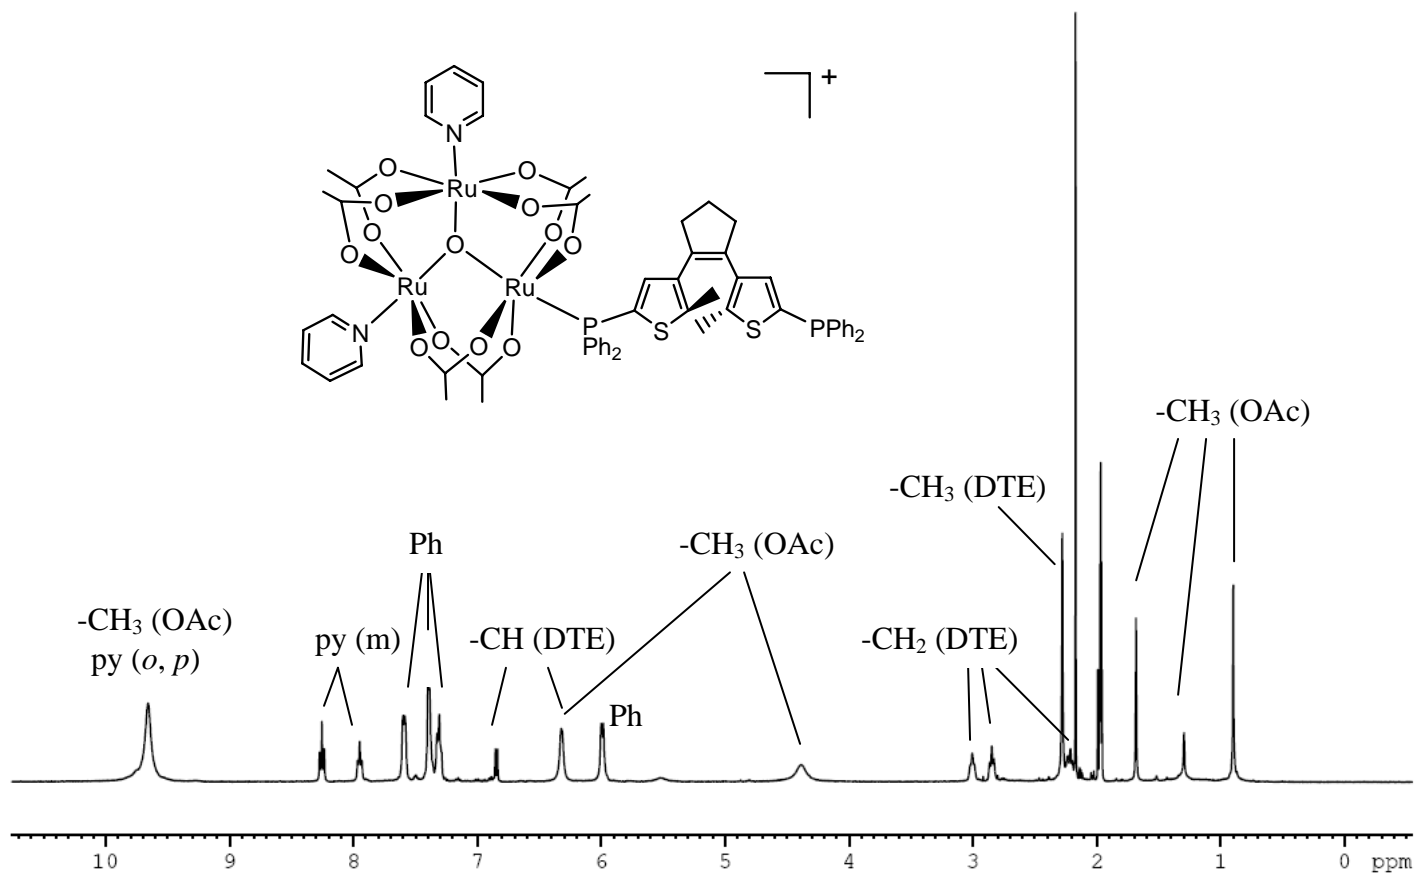

**Fig. S1.**  $^1\text{H}$  NMR (400 MHz) spectrum of compound  $[2(o)]^+$  in  $\text{CD}_3\text{CN}$ .

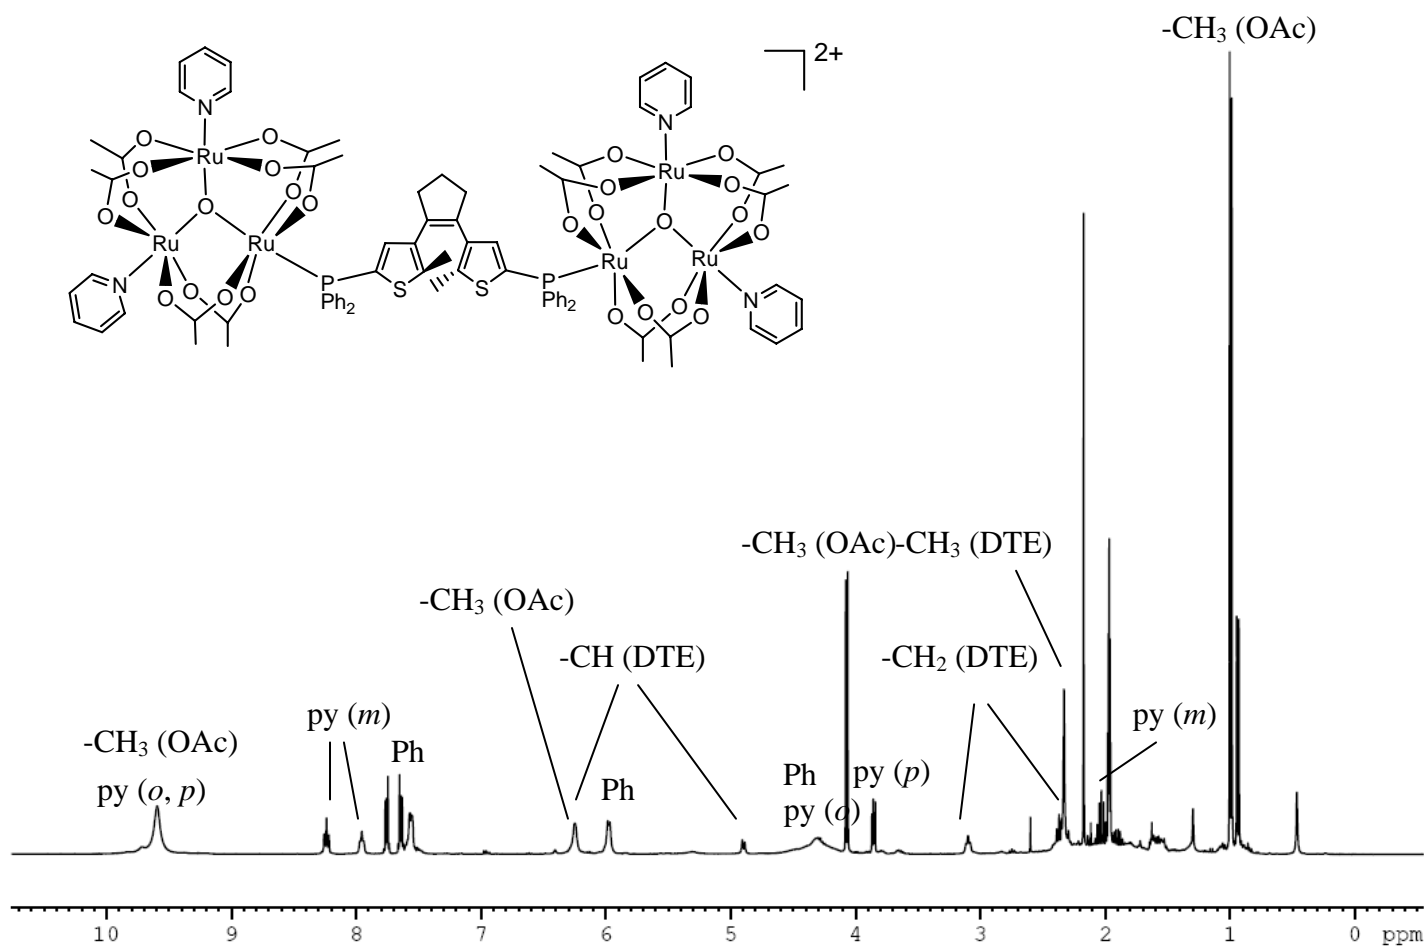

**Fig. S2.**  $^1\text{H}$  NMR (400 MHz) spectrum of compound  $[3(o)]^{2+}$  in  $\text{CD}_3\text{CN}$ .

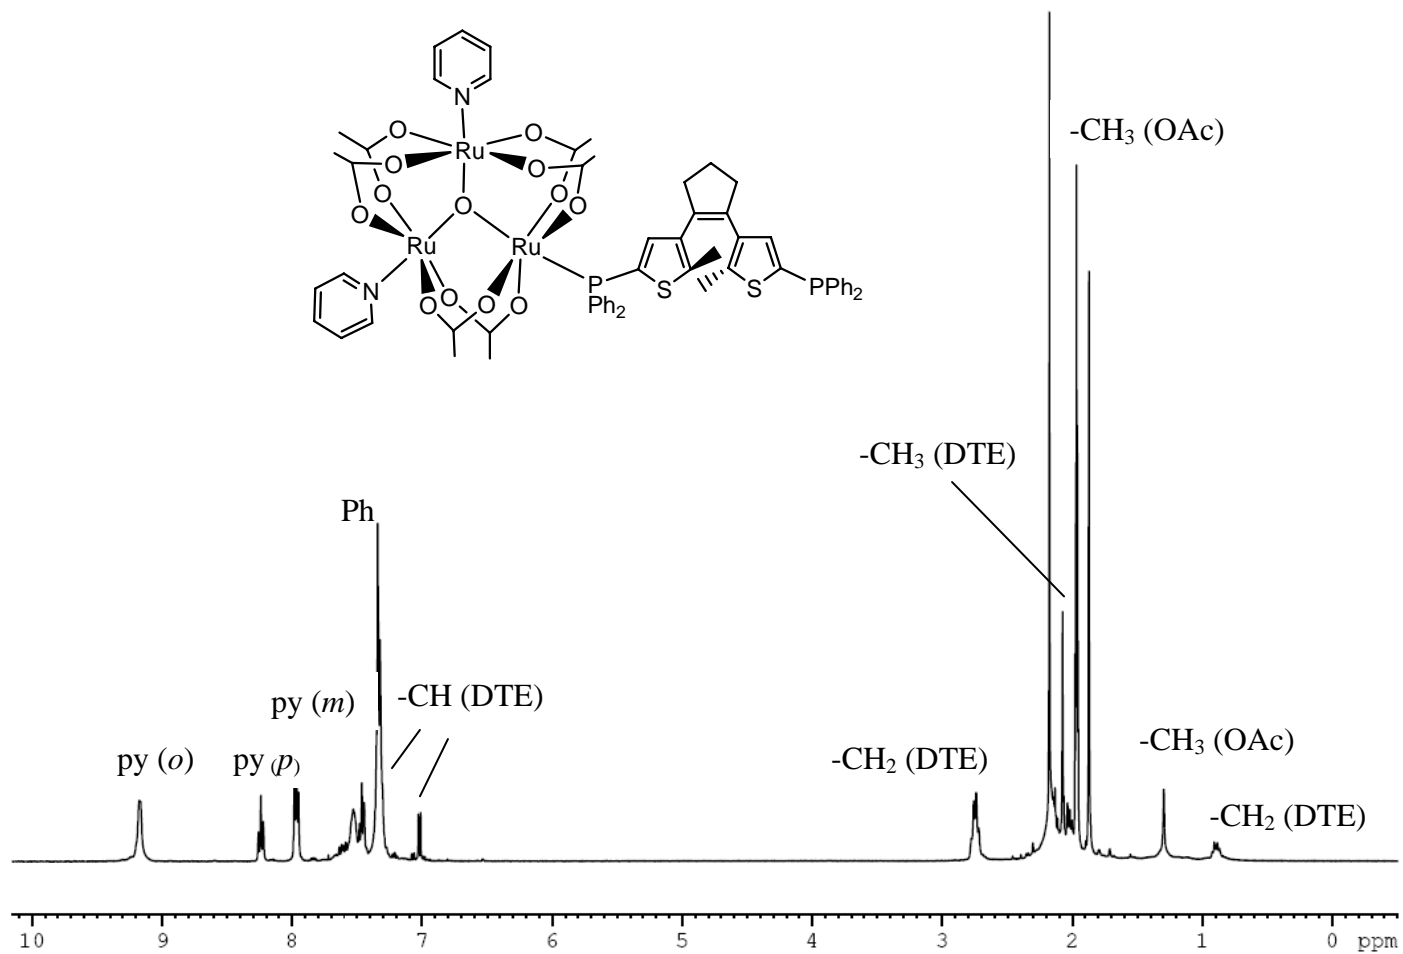

**Fig. S3.** <sup>1</sup>H NMR (400 MHz) spectrum of compound **2(o)** in CD<sub>3</sub>CN.

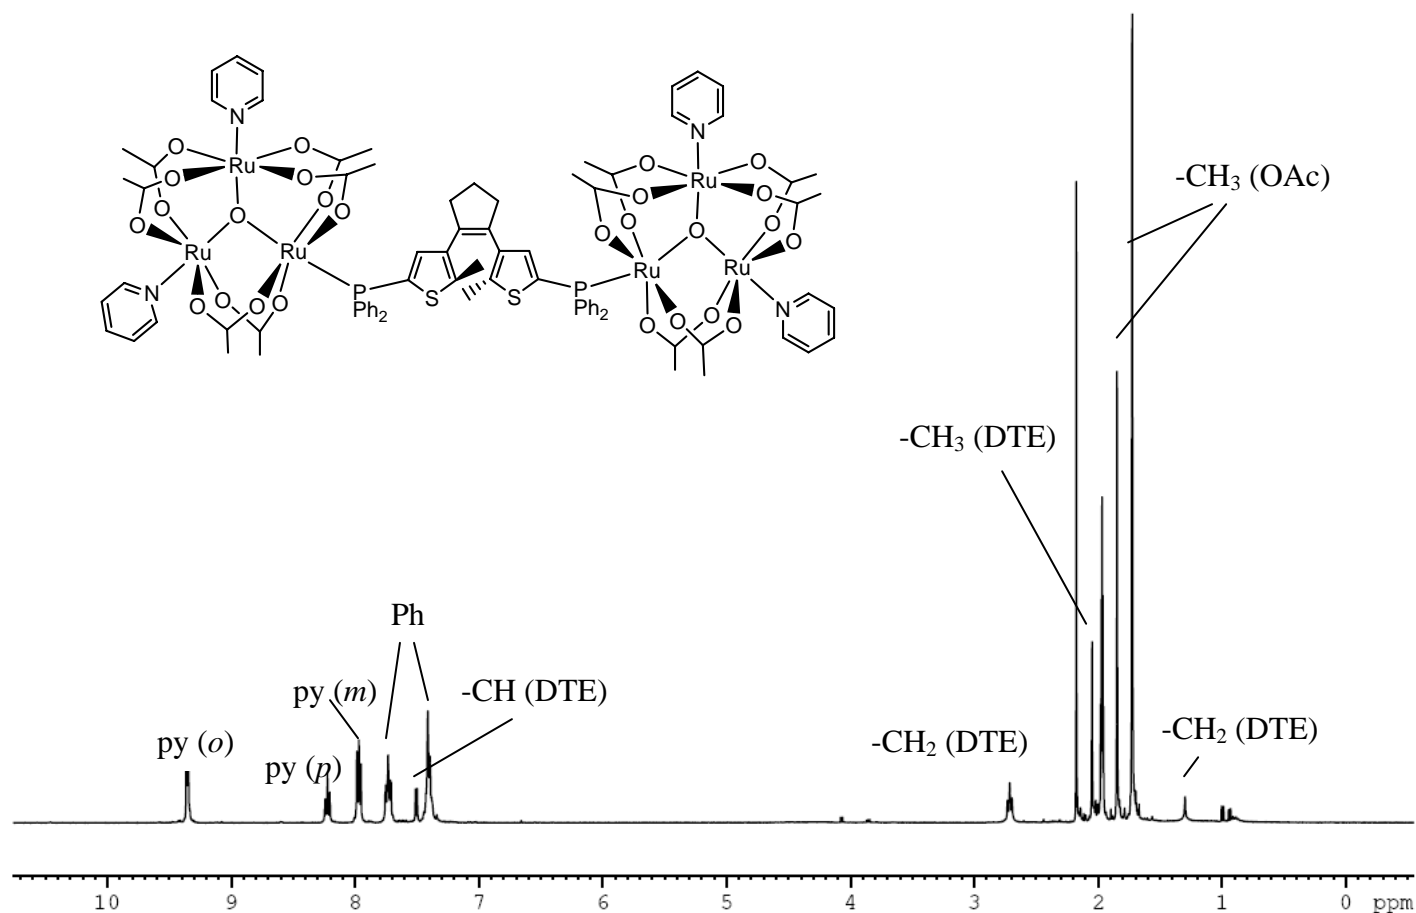

**Fig. S4.**  $^1\text{H}$  NMR (400 MHz) spectrum of compound **3(o)** in  $\text{CD}_3\text{CN}$ .

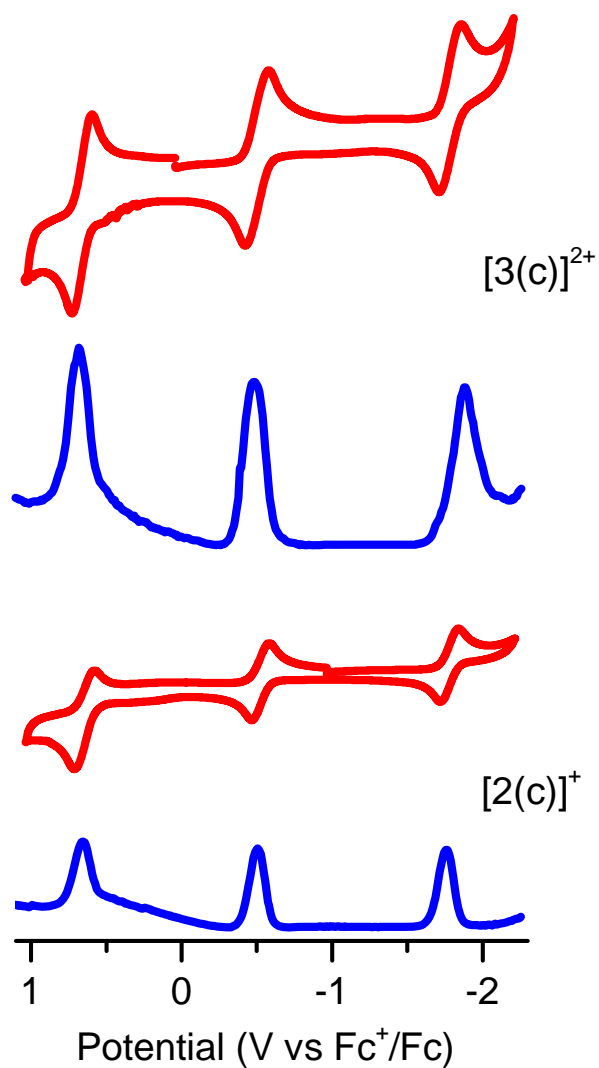

**Fig. S5** Plots of cyclic and differential pulse voltammograms for compounds  $[2(c)]^+$  and  $[3(c)]^{2+}$  recorded after irradiation of  $[2(o)]^+$  and  $[3(o)]^{2+}$  at 254 nm in 0.1 M acetonitrile solution of  $(\text{Bu}_4\text{N})(\text{PF}_6)$ . The scan rates are 100  $\text{mV s}^{-1}$  for CV and 20  $\text{mV s}^{-1}$  for DPV.

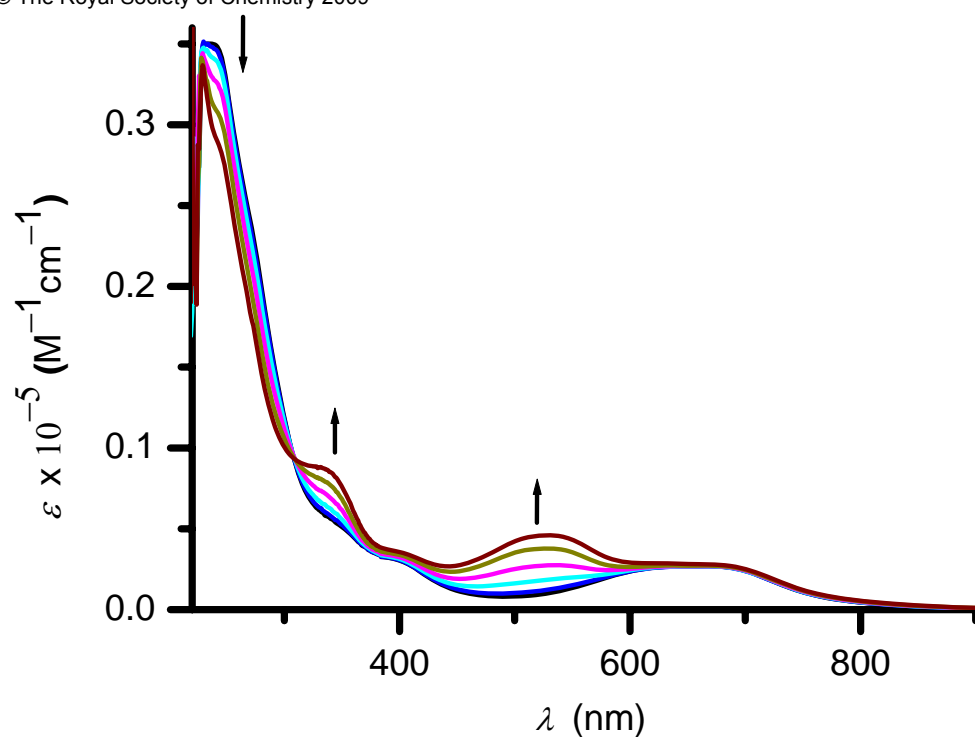

**Fig. S6.** UV-vis absorption spectra of  $[2]^+$  ( $2.0 \times 10^{-5}$  mol/L) in dichloromethane upon irradiation with UV light (254 nm) at 0, 1, 3, 6, 10, 15 min.

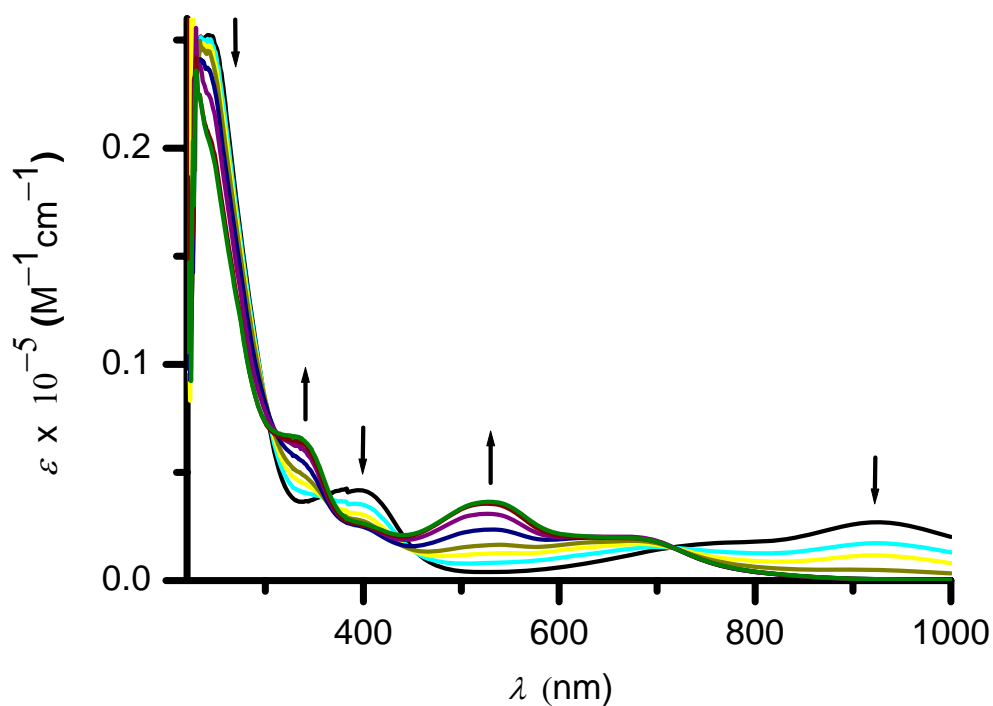

**Fig. S7.** UV-vis absorption spectra of **2** ( $2.0 \times 10^{-5}$  mol/L) in dichloromethane upon irradiation with UV light (254 nm) at 0, 1, 3, 5, 9, 15, 23, 30 min.



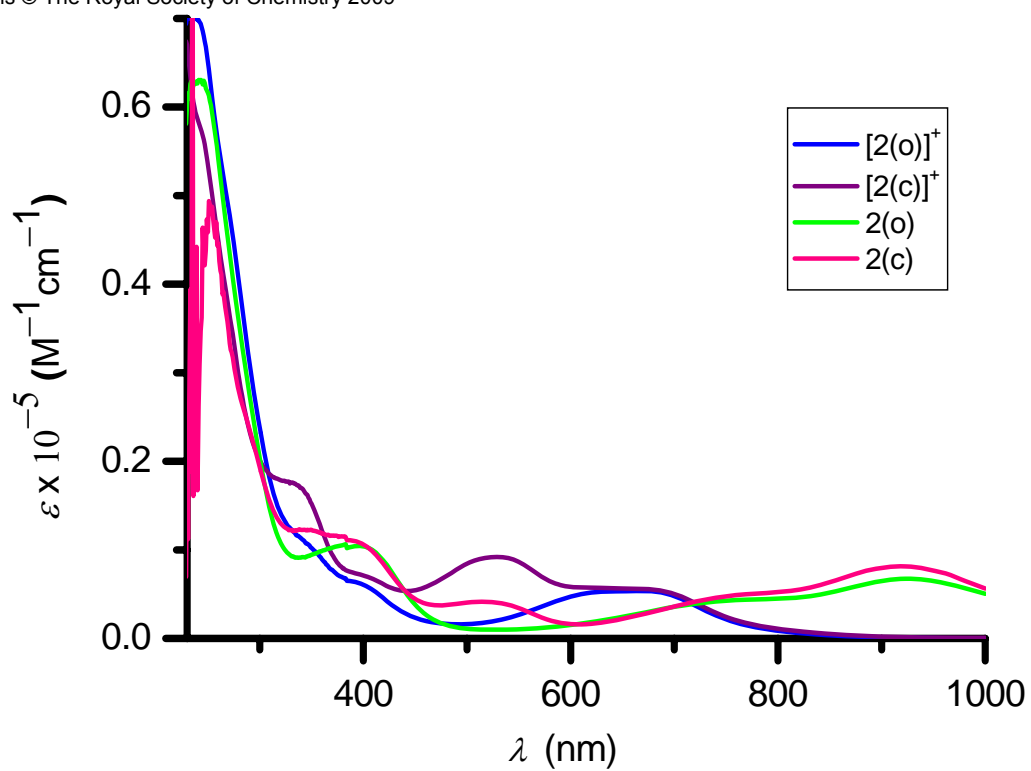

**Fig. S8.** UV-vis absorption spectra of  $[2(o)]^+$ ,  $2(o)$ ,  $[2(c)]^+$ , and  $2(c)$ .

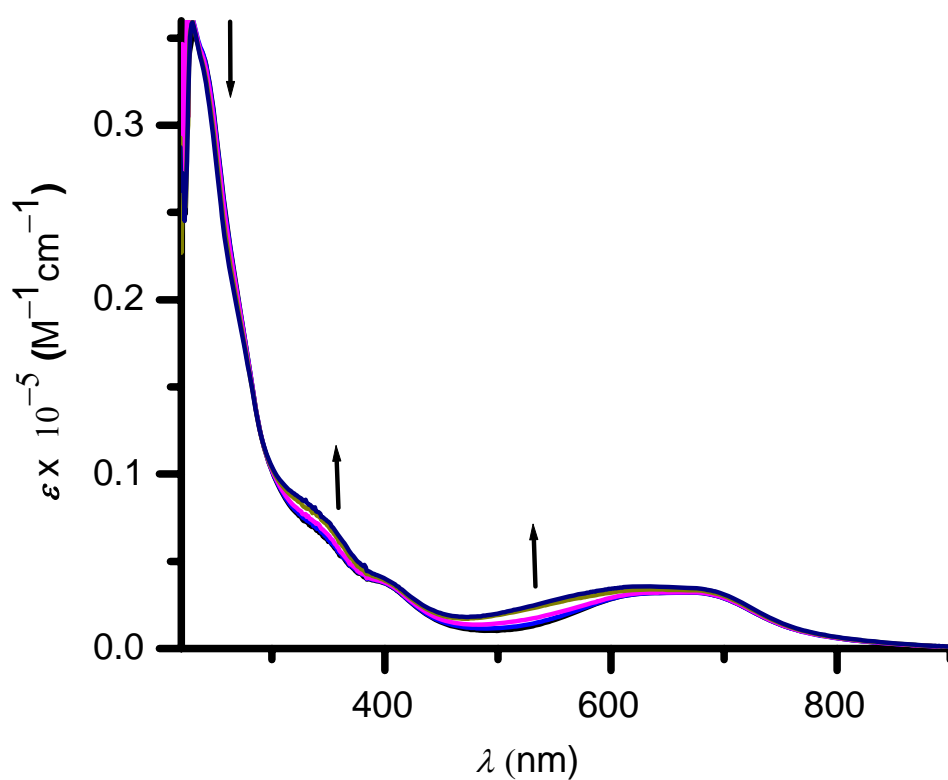

**Fig. S9.** UV-vis absorption spectra of  $[3]^{2+}$  ( $2.0 \times 10^{-5}$  mol/L) in dichloromethane upon irradiation with UV light (254 nm) at 0, 0.5, 1, 4, 6 min.

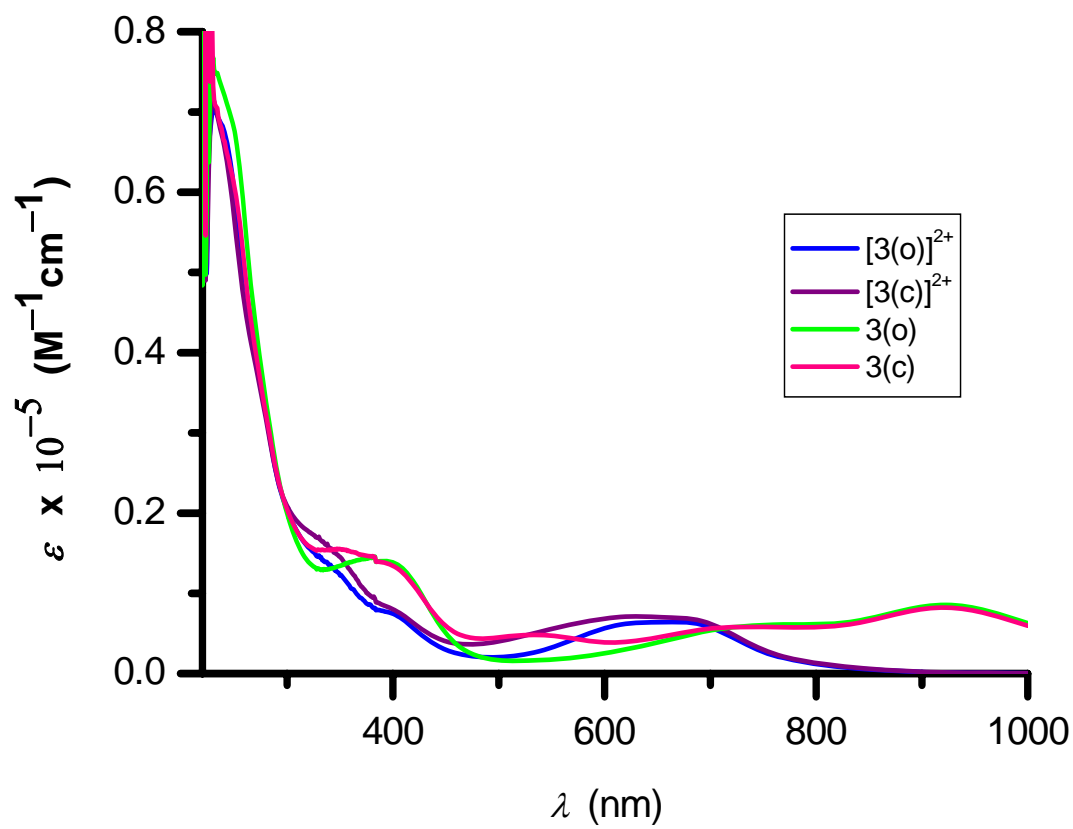

**Fig. S10.** UV-vis absorption spectra of  $[3(o)]^{2+}$ ,  $3(o)$ ,  $[3(c)]^{2+}$ , and  $3(c)$ .
